# Supplementary material
Source: Springer Nature journal article supplement (https://www.springermedizin.de/resource/supplementary/12889_2010_2694_MOESM3_ESM.pdf/9487120)
Supplement: MOESM3 [file 9487120]

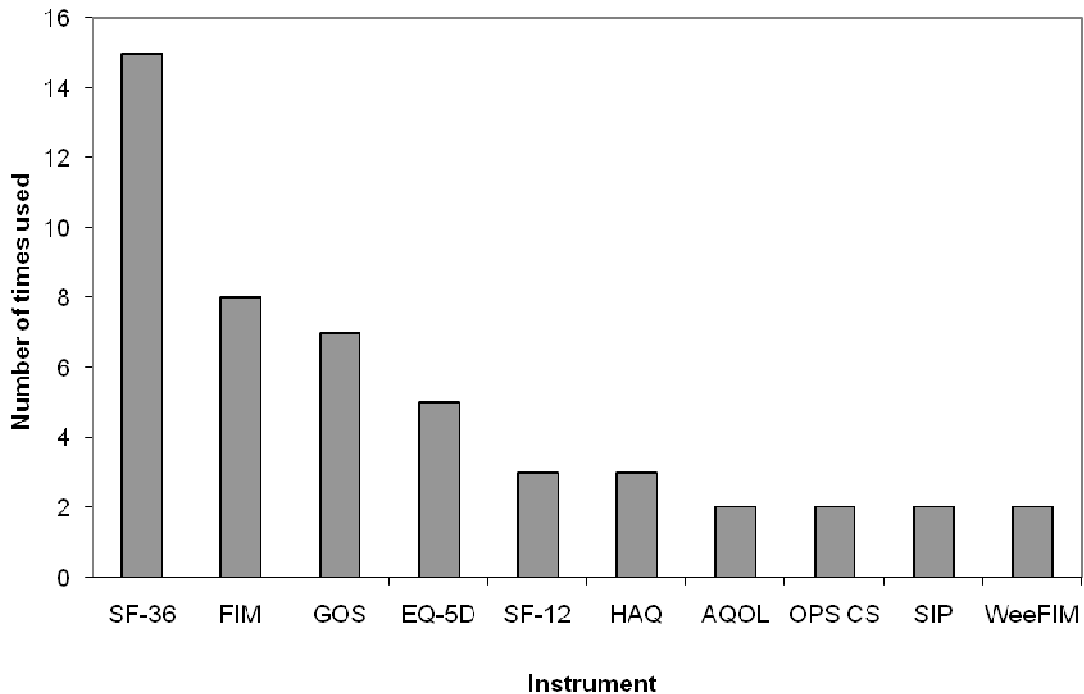

Footnote: The figures are based on number of cohorts instead of number of studies. Instruments that were used once were not displayed in the figure.
